# Supplementary material for: Hedgehogs on the move: Testing the effects of land use change on home range size and movement patterns of free-ranging Ethiopian hedgehogs
Source: PubMed Central journal article supplement (PMC5528257; doi:10.1371/journal.pone.0180826), 2017-07-26
Supplement: pone.0180826.s002.pdf [file pone.0180826.s002.pdf]

الإشارة : ٣٤١/١٥/٠١

التاريخ : ٢٠١٥ / ٢ / ١

المحترم،

الدكتورة/ فاطمة عمار النعيمي

رئيس قسم العلوم البيولوجية والبيئية

جامعة قطر

الدوحة

السلام عليكم ورحمة الله وبركاته،،،

### الموضوع : إجراء بحث بيئي في محمية الريم - جامعة قطر

يهديكم قطاع المحميات الطبيعية أطيب تحية،بالإشارة الى كتابكم (مرفق) بخصوص الموضوع اعلاه وفي اطار التعاون المشترك نحيطكم علما بأنه لامانع لدينا من اجراء البحث في محمية الريم .  
عليه يرجى التكرم بالإيعاز لجهة الاختصاص لديكم للتنسيق مع السيد/ ناصر الكبيسي ، هاتف رقم (٥٥٨٥٥٥١٠).

وتفضلوا سيادتكم بقبول فائق الاحترام والتقدير،،

  
نواف جبر النعيمي

مدير مكتب رئيس القطاع

المرفقات :

• نسخة من الكتاب المشار اليه اعلاه .

نسخة الى :

• السيد/مدير إدارة الحمى .

من محمياتنا ...

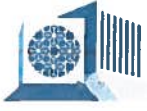

قطاع المحميات الطبيعية  
الشؤون الإدارية والمالية  
رقم الوارد: ١٠٩/١٥/١٤  
التاريخ: ٢٥/٥/٢٥  
توقيع المستلم:

السيد رئيس قطاع المحميات الطبيعية  
المكتب الهندسي الخاص  
صندوق بريد 18859  
فاكس 44207734  
الدوحة - قطر

الموضوع: إجراء بحث بيئي في محمية الريم - جامعة قطر

السلام عليكم ورحمة الله وبركاته

نرجو التكرم بتمديد الموافقة بالسماح للدكتور نوبي ياماغوشي -و الذي يعمل كعضو هيئة تدريس في قسم العلوم البيولوجية والبيئية في جامعة قطر- و فريقه بالدخول و العمل في محمية الريم لإجراء بحوث ميدانية لدراسة سلوك و بيئية القنفذ الأثيوبي حتى نهاية العام 2015. علما بأنهم قد حصلوا على الموافقة للعمل خلال العام 2014 بالإشارة لكتابكم بتاريخ 2014/4/7 (مرفق).

كما يرجى العلم بأن البحث المدعوم من الصندوق القطري لرعاية البحث العلمي (بحث رقم 5-083-1-019) يستغرق ثلاث سنوات (سبتمبر 2013 - أغسطس 2016) سيتضمن إصطياد القناذ البرية الساكنة للمنطقة خلال ساعات الليل ومن ثم إطلاقها بعد تركيب أجهزة استشعار عن بعد عليها و ذلك لدراسة أعدادها في المنطقة و تحركاتها الطبيعية و تزاوجها. كما أن فريق البحث و المكون من الدكتور نوبي ياماغوشي و الدكتور محمد عدنان أبوبكر و الأستاذ إيفان منديز يمتلكون الخبرة اللازمة للتعامل مع هذه الكائنات، كما أنهم على علم بطبيعة المنطقة. في حال الحاجة للاستفسار عن تفاصيل البحث، يرجى الاتصال مع منسق المشروع: د. محمد أبوبكر على هاتف 55124888، بريد الكتروني [mabubaker@qu.edu.qa](mailto:mabubaker@qu.edu.qa)

و نفضلوا بقبول فائق الاحترام و التقدير،،

رئيس قسم العلوم البيولوجية و البيئية

د. فاطمة عمار النعيمي

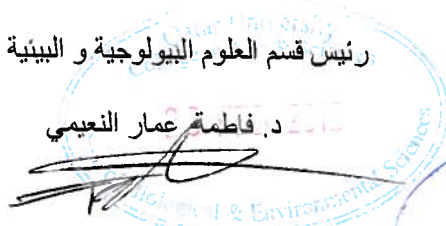

الدكتور  
السيد  
للتجديد  
٢٥/٥/٢٥

الإشارة : ٢٨٤ / ١٤١٤  
التاريخ : ٧ / ٤ / ٢٠٢١

السيد/ رئيس قسم العلوم البيولوجية والبيئة المحترم،  
كلية الآداب والعلوم  
جامعة قطر  
الدوحة

السلام عليكم ورحمة الله وبركاته...

**الموضوع : إجراء بحث بيئي في محمية الريم - جامعة قطر**

يهديكم قطاع المحميات الطبيعية أطيب تحية، وبالإشارة إلى كتابكم رقم: ١٩٤٥ (مرفق) بخصوص الموضوع أعلاه وفي إطار التعاون المشترك نحيطكم علماً بأنه لا مانع لدينا من إجراء البحث في محمية الريم.

عليه يرجى من التكرم بالإيعاز لجهة الاختصاص لديكم للتنسيق مع السيد/ ناصر الكبيسي، جوال رقم: ٥٥٨٥٥٥١٠.

وتفضلوا سيادتكم بقبول فائق الاحترام والتقدير،،،



نواف جبر النعيمي  
مدير مكتب رئيس القطاع

نسخة :  
السيد/ مدير إدارة الحمى.

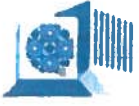

قسم العلوم البيولوجية والبيئية  
Dept. of Biological & Environmental Sciences

17 FEB 2014

1945

رقم الصادر:

قطاع المحميات الطبيعية

الشؤون الإدارية والمالية

رقم الورقة: ١٤/١٤/٧١

التاريخ: ١٤/١٤/٢٠١٤

توقيع المستلم:

السيد رئيس قطاع المحميات الطبيعية

المكتب الهندسي الخاص

الدوحة

الموضوع: إجراء بحث بيئي في محمية الريم - جامعة قطر

السلام عليكم ورحمة الله وبركاته ...

نود أن نخطبكم علماً بأن الدكتور نوي ياماغوشي و الذي يعمل كعضو هيئة تدريس في قسم العلوم البيولوجية و البيئية في جامعة قطر قد حصل على دعم من الصندوق القطري لرعاية البحث العلمي (بمحت رقم 5-083-1-019) لإجراء بحوث ميدانية لدراسة سلوك و بيئة القنفذ الأثيوبي. نرجو السماح له بالعمل في منطقة روضة الفرس و تسهيل مهمته ما أمكن، كما نرجو السماح له بالدخول و العمل في محمية الريم و ذلك لمقارنة النتائج من روضة الفرس (و التي تتميز بانتشار المزارع الخاصة) مع بيئة طبيعية وذلك خلال الفترة Feb. و 2014 Dec.

كما يرجى العلم بأن البحث سيتضمن اصطيد القنفاذ البرية الساكنة للمنطقة خلال ساعات الليل ومن ثم إطلاقها بعد تركيب أجهزة استشعار عن بعد عليها وذلك لدراسة أعدادها في المنطقة و تحركاتها الطبيعية وتزاوجها. كما أن فريق البحث وملكون من الدكتور نوي ياماغوشي و الدكتور محمد عدنان أبو بكر والأستاذ إيفان منديز يمتلكون الخبرة اللازمة للتعامل مع هذه الكائنات، كما أنهم على علم بطبيعة المنطقة و قد قاموا بإجراء الاتصالات اللازمة مع المزارع الخاصة للسماح لهم بالعمل. للاستفسار عن تفاصيل البحث، يرجى الاتصال مع منسق المشروع: د. محمد أبو بكر على هاتف 55124888، بريد الكتروني [mabubaker@qu.edu.qa](mailto:mabubaker@qu.edu.qa)

و تفضلوا بقبول فائق الاحترام و التقدير...

أ. د. سمير الجوة

رئيس قسم العلوم البيولوجية و البيئية
